# Supplementary material for: Anisotropic sol–gel transition: the influence of sample thickness, pressure and strain
Source: Royal Society of Chemistry journal article supplement (doi:10.1039/d2sm01169g), 2022-01-01
Supplement: d2sm01169g1.pdf [file d2sm01169g1.pdf]

## Supplementary information

### **Anisotropic sol-gel transition: Influence of sample thickness, pressure and strain**

G.V. Varshini,<sup>†a,b</sup> Srividhya Parthasarathi,<sup>†c</sup> D. S. Shankar Rao,<sup>a</sup> and  
S. Krishna Prasad<sup>a\*</sup>

<sup>a</sup>*Centre for Nano and Soft Matter Sciences, Shivanapura, Bangalore 562162, India*

<sup>a,b</sup>*Physics Department, Mangalore University, Mangalagangothri, India*

<sup>c</sup>*Present address: Physics Department, IISc Bangalore 560012, India*

*\*email: skpras@gmail.com*

#### Contents

- 1) Qualitative testing for the formation of gel.
- 2) Strain amplitude dependence of the storage ( $G'$ ) and loss ( $G''$ ) moduli for a 100  $\mu\text{m}$  thick sample at 25 °C.
- 3) Thermal variation of complex viscosity  $\eta^*$  for TCMG for two different sample thicknesses.
- 4) Laser transmission profiles as a function of temperature at different pressures.

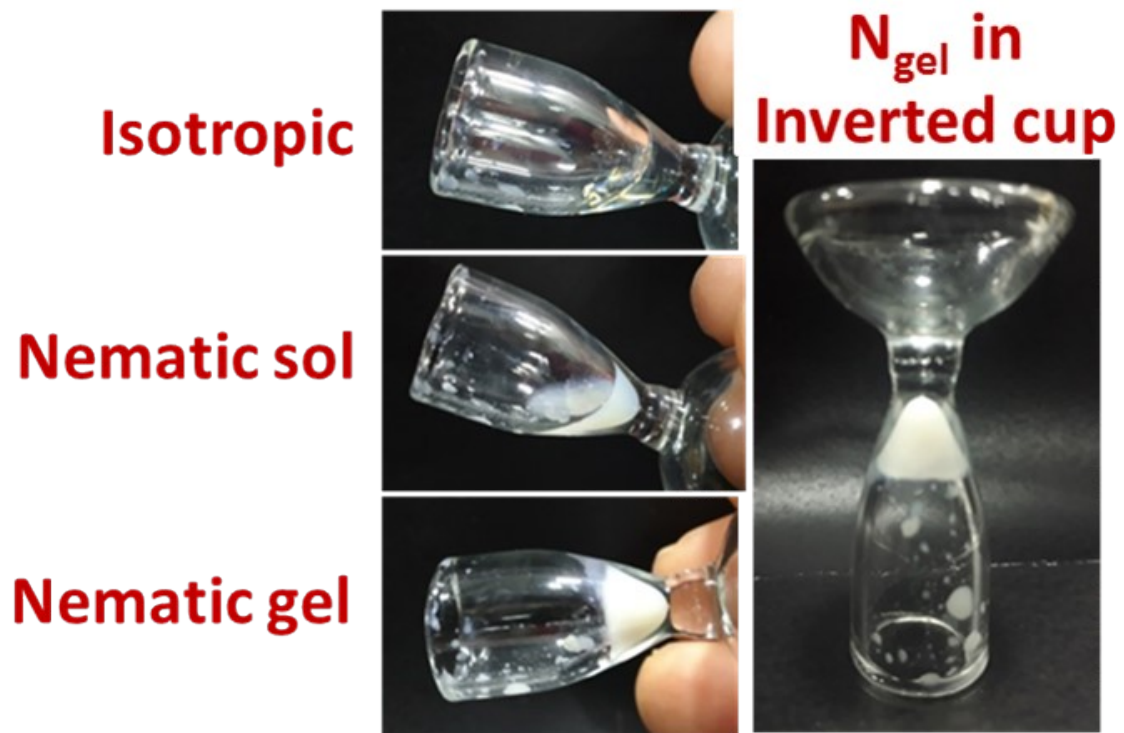

**Figure SI-1:** Qualitative testing for the formation of gel by tube inversion method. Left panel shows transparent flowing liquid in isotropic, translucent yet fluid in nematic phase and immovable in gel phase. Right side of the image shows inverted cup where the gel phase is formed.

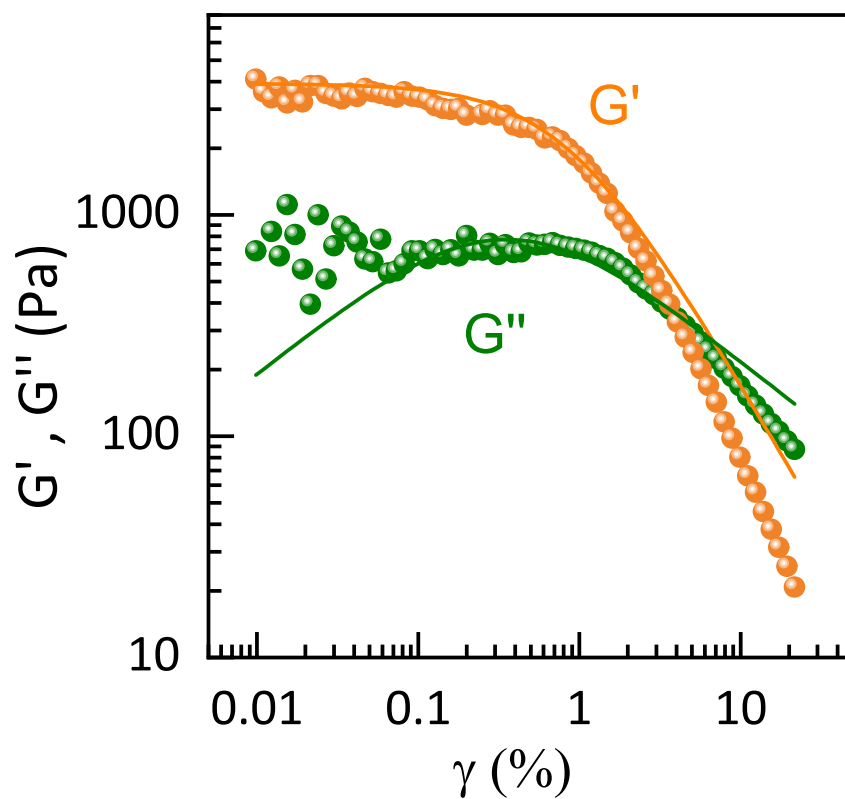

**Figure SI-2:** Strain amplitude dependence of the storage ( $G'$ ) and loss ( $G''$ ) moduli for a 100  $\mu\text{m}$  thick sample at 25°C with a fixed angular frequency of 1 rad/s. The solid lines in respective colours indicate the fit to Krauss equations eqs. 6 and 7.

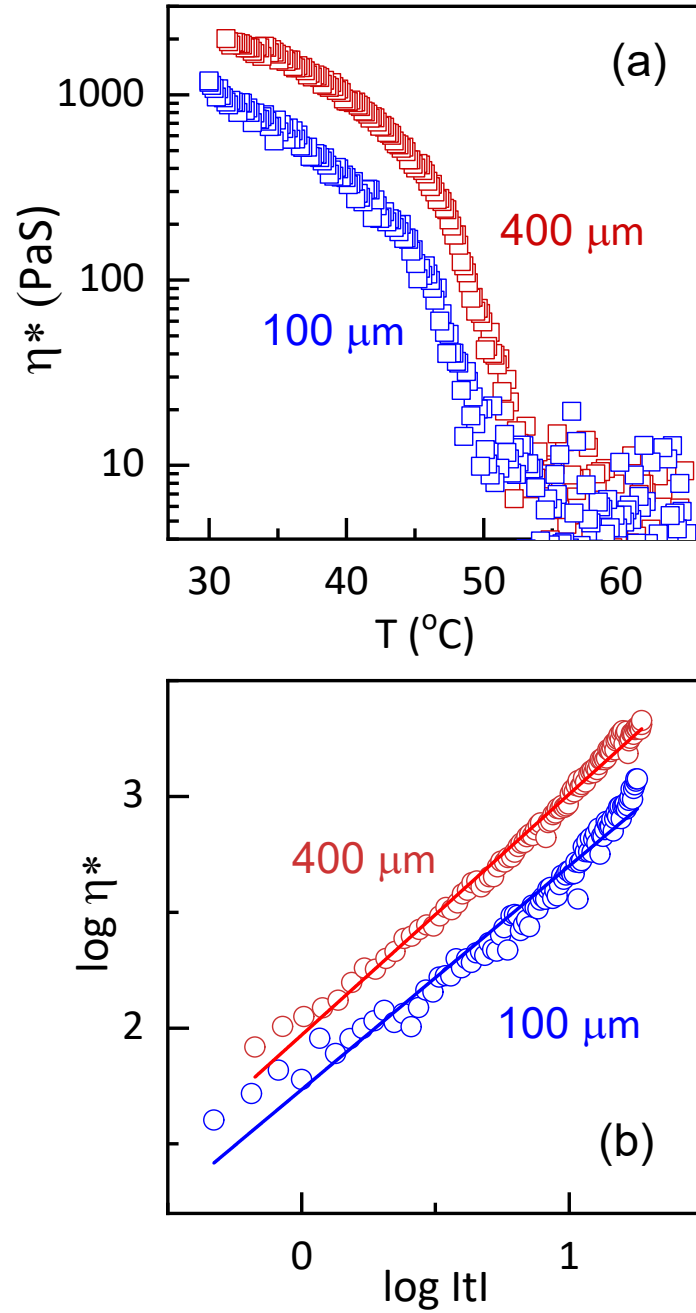

**Figure SI-3:** (a) Thermal variation of complex viscosity  $\eta^*$  for TCMG for two different sample thicknesses. (b) shows the double logarithmic plot for  $\eta^*$  yielding power-law exponent,  $p$ ,  $1.04 \pm 0.01$  and  $0.97 \pm 0.02$  for 400  $\mu\text{m}$  and 100  $\mu\text{m}$  respectively.

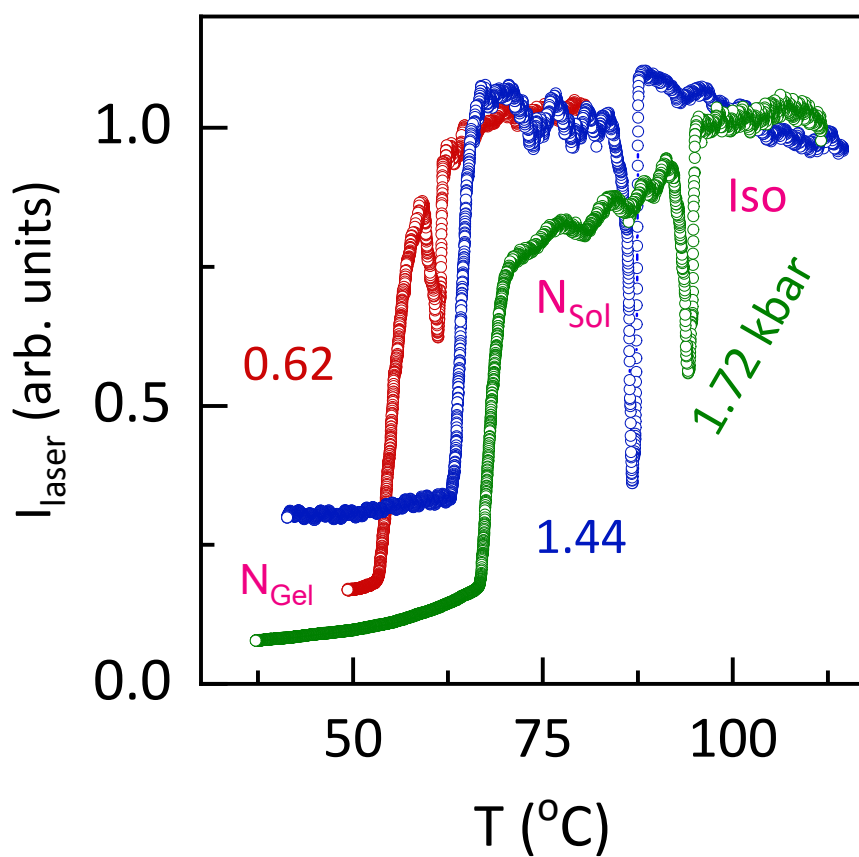

**Figure SI-4:** Laser transmission profiles as a function of temperature for different pressures. Both  $T_{sg}$  and  $T_{Iso-Nsol}$ , marked by a step and a negative peak, respectively, increase with an increase in pressure.

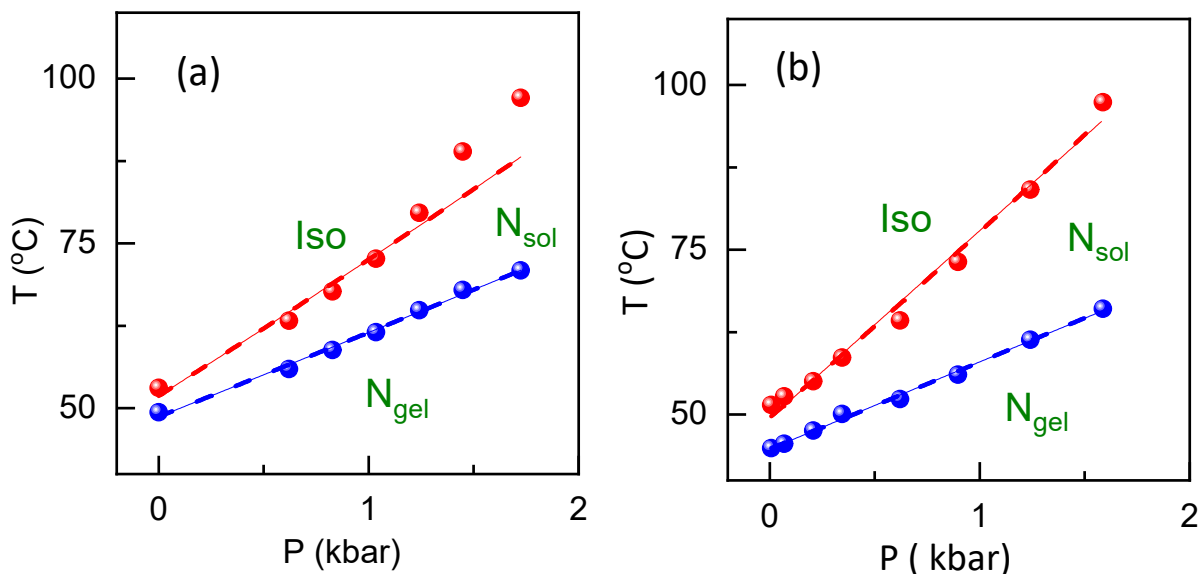

**Figure SI-5:** Temperature vs. Pressure phase diagram for (a) TCMG (1.5 wt % of HSA) and (b) TCMG<sub>0.8</sub> (0.8 wt % of HSA). The solid line represents the fit-line to SG eq (13). The dashed line represents the fit for Clausius – Clapeyron eq (12). Both fits are essentially indistinguishable.
